# Supplementary material
Source: MDPI journal article supplement (https://www.mdpi.com/2076-0825/12/4/172)
Supplement: s1 [file s1]

# A Modular Soft Gripper with Combined Pneu-Net Actuators

Xinjie Zhang <sup>1,2,\*</sup>, Shouyi Yu <sup>1</sup>, Jianlong Dai <sup>1</sup>, Ayobami Elisha Oseyemi <sup>3</sup>, Linlin Liu <sup>1</sup>, Ningyu Du <sup>1</sup> and Fangrui Lv <sup>1</sup>

<sup>1</sup> College of Mechanical and Electrical Engineering, Hohai University, Changzhou 213022, China

<sup>2</sup> School of Mechanical Engineering, Southeast University, Nanjing 211189, China

<sup>3</sup> Department of Mechanical Engineering, York University, Toronto, ON M3J1P3, Canada

\* Correspondence: xj.zhang@hhu.edu.cn

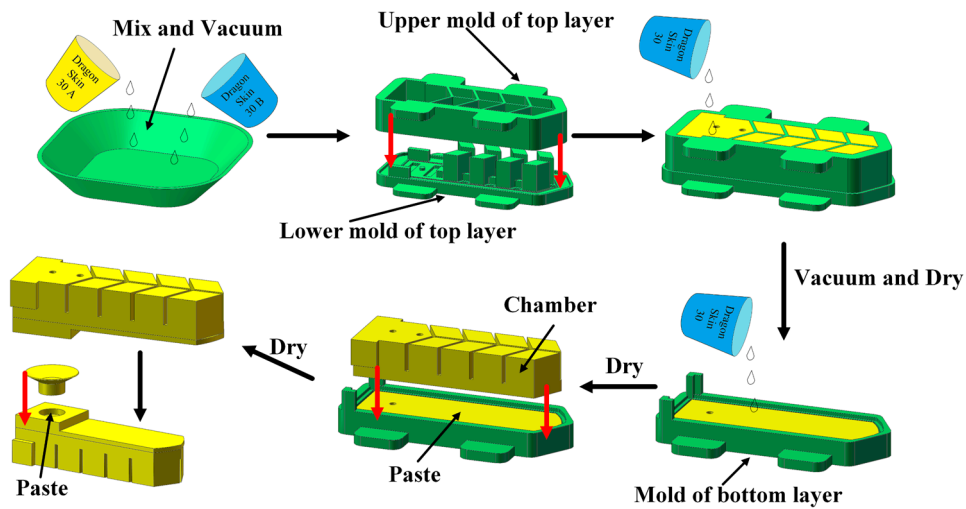

**Figure S1.** Schematic diagram of the actuator fabrication process.

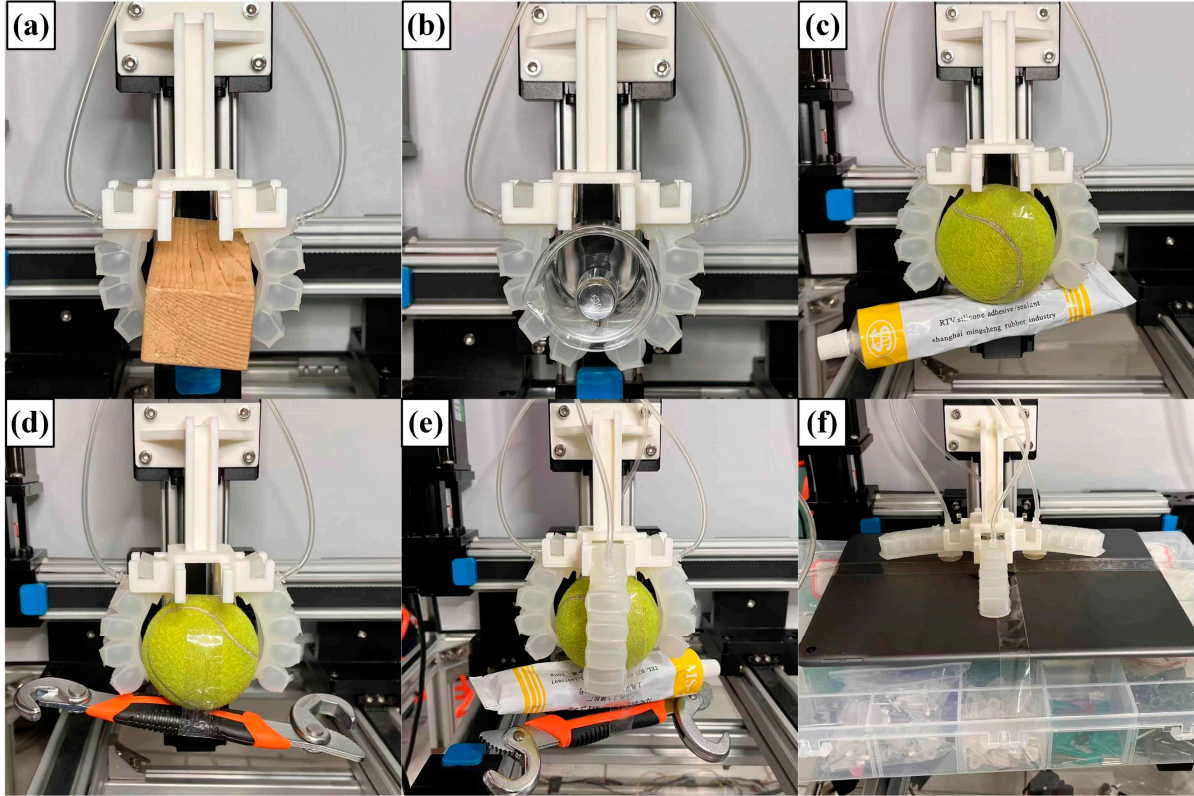

**Figure S2.** Snapshots of the function tests of the modular soft gripper (Sort by target weight listed in Table SIII). The test objects are: (a) a wooden block, (b) a beaker with weights, (c) a tennis and a glue, (d) a tennis and a wrench, (e) a tennis, a glue and a wrench, and (f) an ipad Air3 and a parts box.

**Table S1.** The required input pressures versus the longitudinal bending angles.

| Longitudinal bending angle | 10°    | 20°    | 30°    | 45°     | 55°     |
|----------------------------|--------|--------|--------|---------|---------|
| Regular                    | 10 kPa | 20 kPa | 30 kPa | 50 kPa  | 60 kPa  |
| Herringbone                | 40 kPa | 60 kPa | 80 kPa | 100 kPa | 120 kPa |

**Table S2.** Object shapes and weights.

| Object                    | Shape    | Weight (g) |
|---------------------------|----------|------------|
| Wooden block              | Cuboid   | 52.4       |
| Beaker with weight        | Cylinder | 81.0       |
| Tennis and glue           | Sphere   | 157.6      |
| Tennis and wrenches       | Sphere   | 249.6      |
| Tennis, glue and wrenches | Sphere   | 354.3      |
| Ipad Air3 and parts box   | Sheet    | 1199.0     |
